# Supplementary material for: Anosmin-1 contributes to brain tumor malignancy through integrin signal pathways
Source: PubMed Central journal article supplement (PMC3869950; doi:10.1530/erc-13-0181), 2014-02

**A**

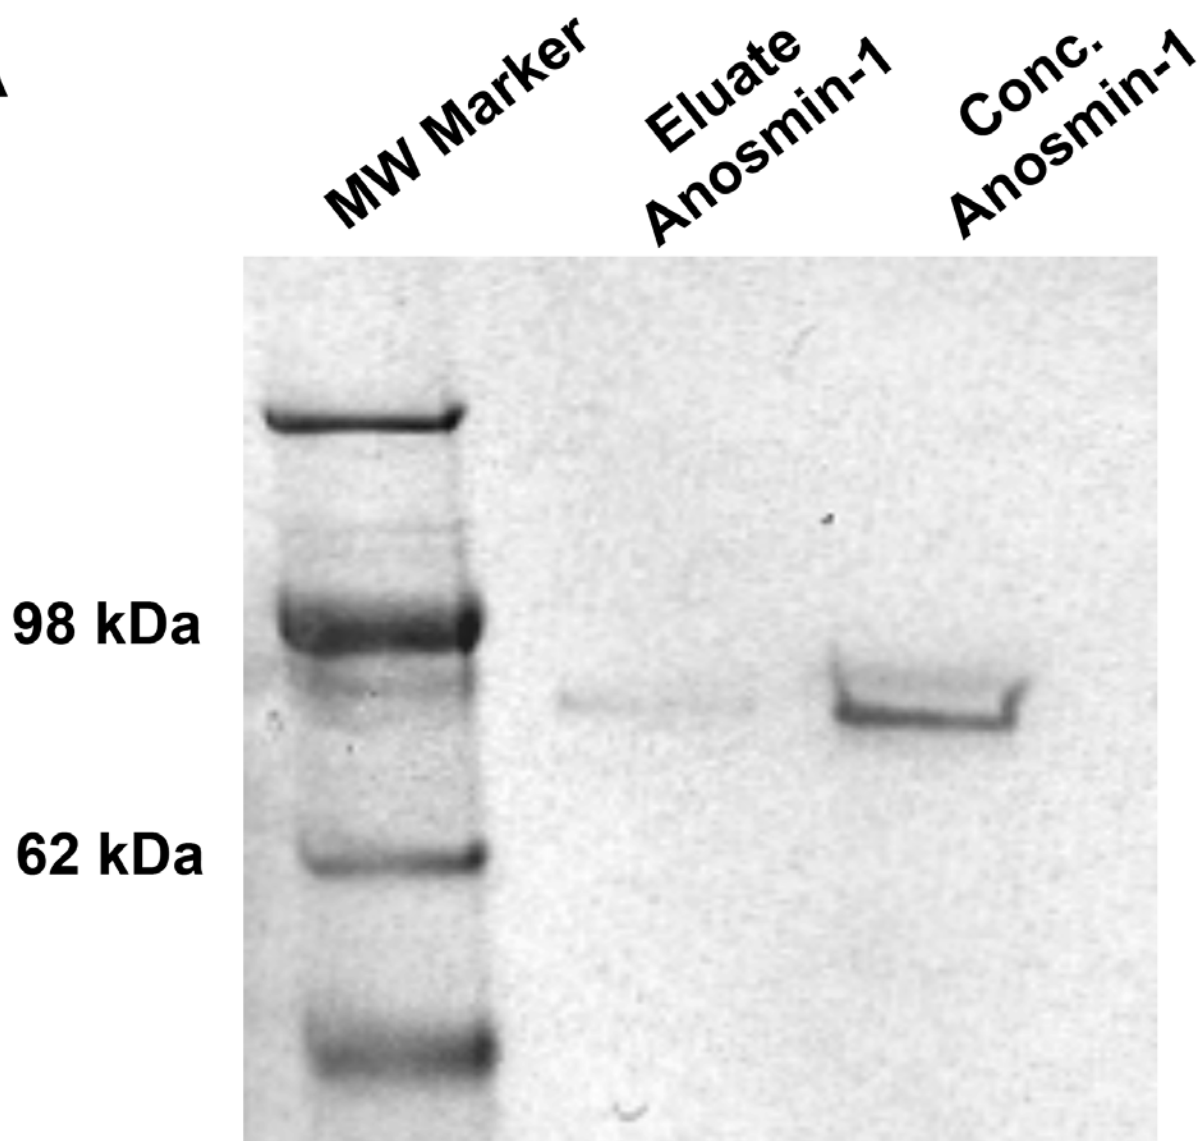

**B**

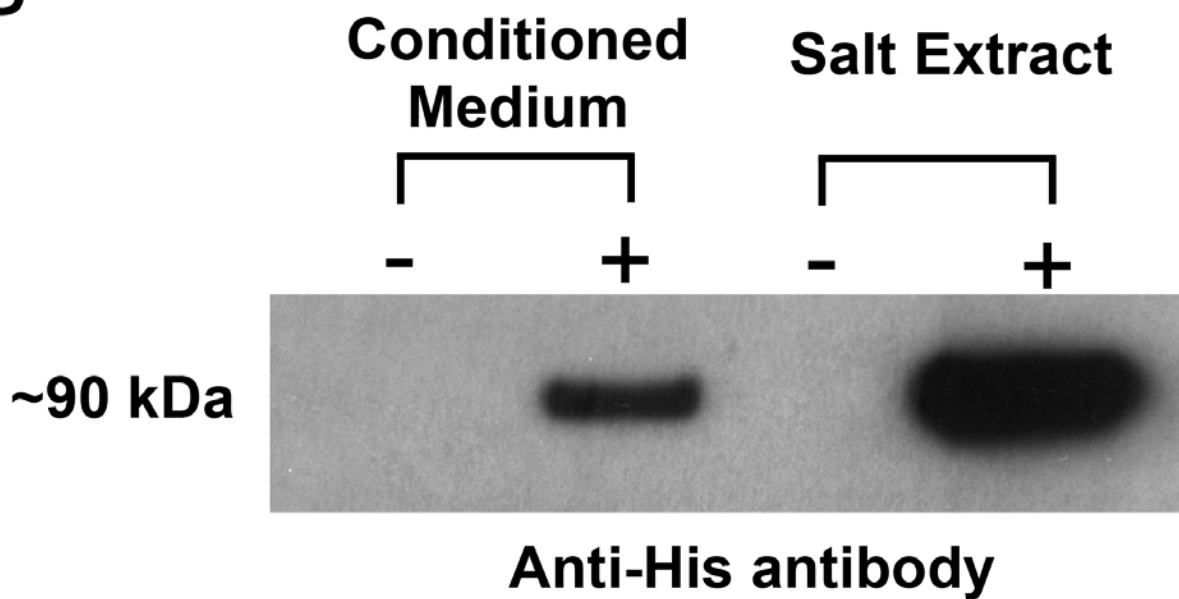

Supplement: supp_ERC-13-0181_Supplementary_figure_2.pdf [file supp_ERC-13-0181_Supplementary_figure_2.pdf]
