# Supplementary material for: Anosmin-1 contributes to brain tumor malignancy through integrin signal pathways
Source: PubMed Central journal article supplement (PMC3869950; doi:10.1530/erc-13-0181), 2014-02

qPCR ratio  
(KAL1 vs  $\beta$ -actin)

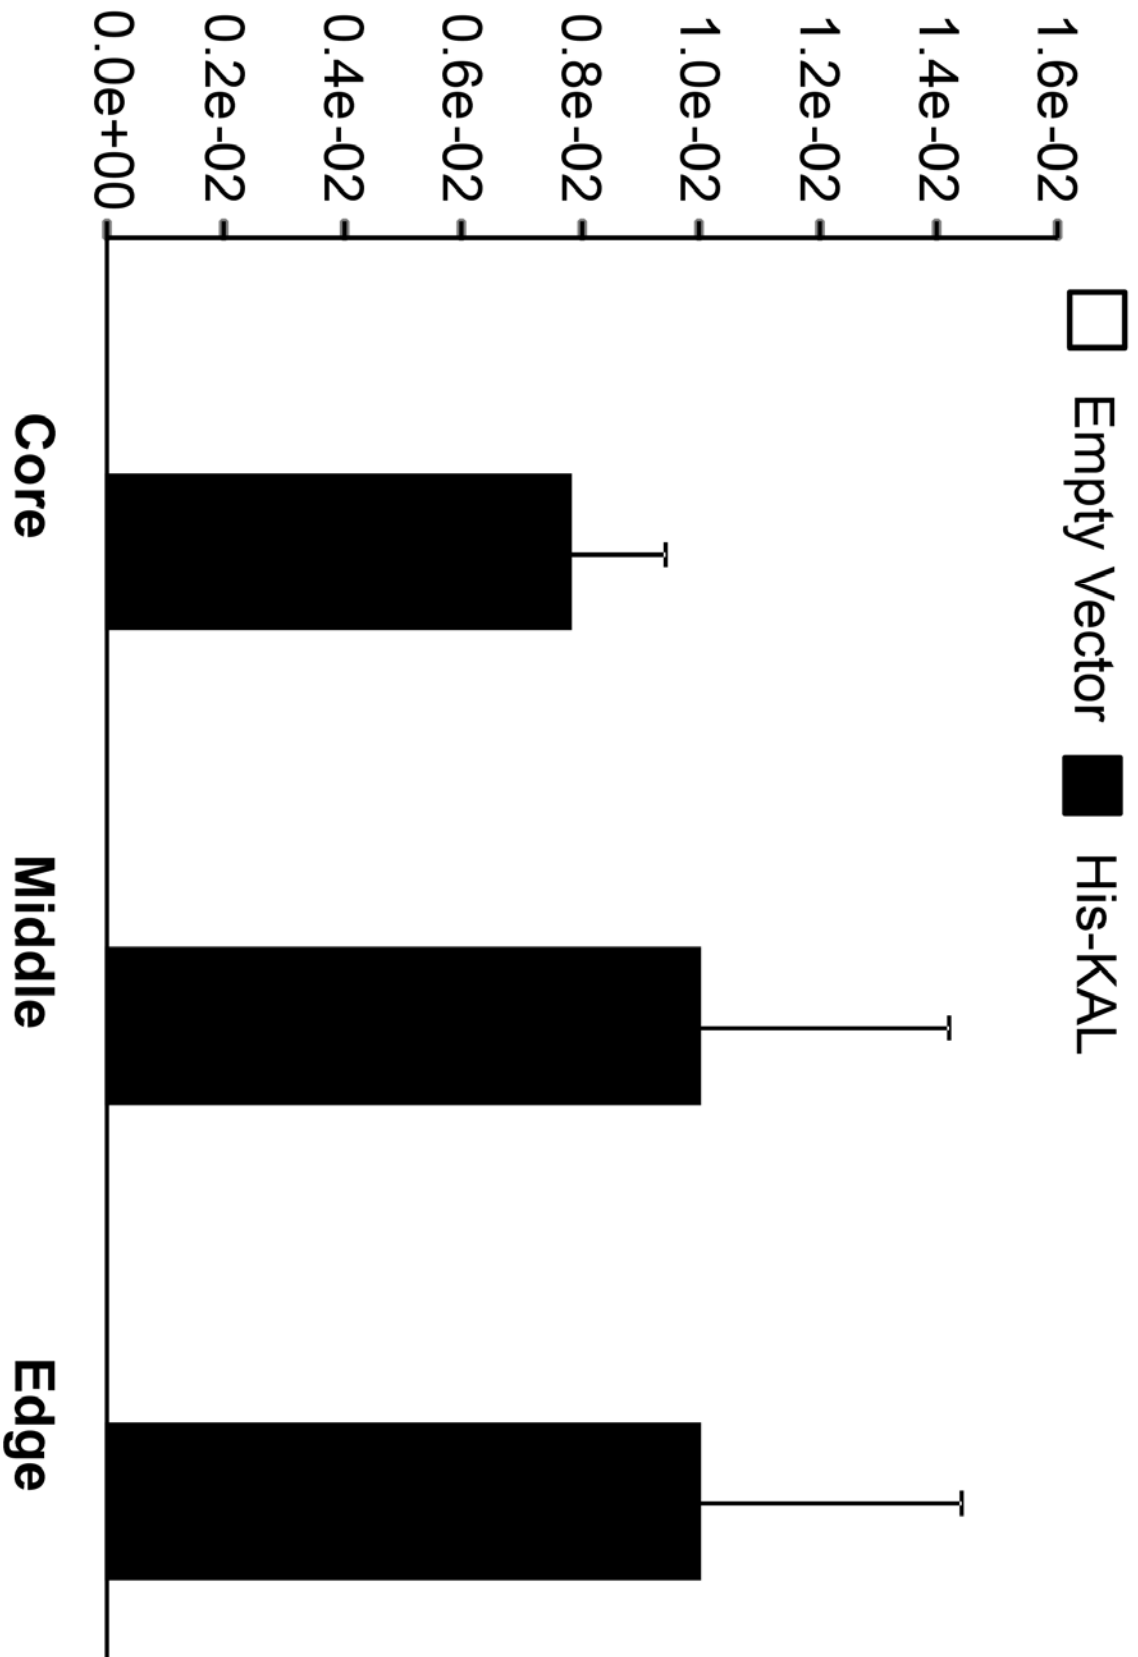

Supplement: supp_ERC-13-0181_Supplementary_figure_3.pdf [file supp_ERC-13-0181_Supplementary_figure_3.pdf]
