# Supplementary material for: Anosmin-1 contributes to brain tumor malignancy through integrin signal pathways
Source: PubMed Central journal article supplement (PMC3869950; doi:10.1530/erc-13-0181), 2014-02
Supplement: supp_ERC-13-0181_Supplementary_table_1.pdf [file supp_ERC-13-0181_Supplementary_table_1.pdf]

**Table S1. Primer sequences and annealing temperatures used in the PCR reactions**

|                        |                                              |      |
|------------------------|----------------------------------------------|------|
| <i>β-Actin</i> forward | 5' AGA GCT ACG AGC TGC CTG AC3'              | 60°C |
| <i>β-Actin</i> reverse | 5' AGC ACT GTG TTG GCG TAC AG3'              |      |
| <i>KAL1</i> forward    | 5' CCT TCT TCC AGC ACT TCC AG 3'             | 60°C |
| <i>KAL1</i> reverse    | 5' TCA CAG CTG GTC AAG CAT TC 3'             |      |
| uPA forward            | 5' TGA GGT GGA AAA CCT CAT CC 3'             | 58°C |
| uPA reverse            | 5' GGC AGG CAG ATG GTC TGT AT 3'             |      |
| FGFR1 forward          | 5' CTG GAT GTC GTG GAG CGG TCC 3'            | 65°C |
| FGFR1 reverse          | 5' TTC CAG AAC GGT CAA CCA TGC AGA 3'        |      |
| pHisKAL, forward       | 5' GCG CTA GCC GCG GCC GGC CCC GGC GCG GCT3' | 50°C |
| pHisKAL, reverse       | 5' CCG GAT CCT TAG TAT CTT TCT GGA GAA GG3'  |      |
