# Supplementary material for: Anosmin-1 contributes to brain tumor malignancy through integrin signal pathways
Source: PubMed Central journal article supplement (PMC3869950; doi:10.1530/erc-13-0181), 2014-02
Supplement: supp_ERC-13-0181_Supplementary_table_2.pdf [file supp_ERC-13-0181_Supplementary_table_2.pdf]

**Table S2. Twelve expression patterns of differential probes.** The expression patterns of 7582 probes (identified from supplementary Fig.2) in the meta-analysis. Total 12 patterns and the probe numbers are shown. The + or – sign represents up- or down-regulation, respectively, in comparison to their base group denoted as B (e.g. 2806 probes in pattern 1 are significantly over-expressed in the low group by the *NL* test and, at the same time, they are up-regulated in the high group by the *NH* test). *KALI* belongs to pattern 1, 5 and 9 (shown in bold).

| Pattern  | Normal   | Low      | High     | No. probes  |
|----------|----------|----------|----------|-------------|
| <b>1</b> | <b>B</b> | +        | +        | <b>2806</b> |
| 2        | B        | +        | -        | 54          |
| 3        | B        | -        | +        | 45          |
| 4        | B        | -        | -        | 2767        |
| <b>5</b> | -        | <b>B</b> | +        | <b>592</b>  |
| 6        | -        | B        | -        | 1098        |
| 7        | +        | B        | +        | 1063        |
| 8        | +        | B        | -        | 405         |
| <b>9</b> | -        | -        | <b>B</b> | <b>1629</b> |
| 10       | -        | +        | B        | 759         |
| 11       | +        | -        | B        | 740         |
| 12       | +        | +        | B        | 794         |
