# Supplementary material for: Anosmin-1 contributes to brain tumor malignancy through integrin signal pathways
Source: PubMed Central journal article supplement (PMC3869950; doi:10.1530/erc-13-0181), 2014-02
Supplement: supp_ERC-13-0181_Supplementary_table_3.pdf [file supp_ERC-13-0181_Supplementary_table_3.pdf]

**Table S3. Relative mRNA levels of different genes in the cell lines used in the study.**

The crossing point (CP) of each sample in triplicates was normalized to the  $\beta$ -actin control and the expression ratio was calculated using the equation,  $\text{Ratio} = \frac{E^{CP_{\beta\text{-actin}}}}{E^{CP_{KAL1}}}$  where  $E$  stands for efficiency of the reaction which was approximately 2.

|              | <b>KAL1</b> | <b>uPA</b> | <b>FGFR1</b> |
|--------------|-------------|------------|--------------|
| <b>LN229</b> | 0           | 5.51E-05   | 8.18E-03     |
| <b>A172</b>  | 2.54E-05    | 3.52E-04   | 2.00E-02     |
| <b>U87MG</b> | 0           | 5.00E-03   | 1.00E-02     |
