# Supplementary material for: Anosmin-1 contributes to brain tumor malignancy through integrin signal pathways
Source: PubMed Central journal article supplement (PMC3869950; doi:10.1530/erc-13-0181), 2014-02
Supplement: supp_ERC-13-0181_Supplementary_table_4.pdf [file supp_ERC-13-0181_Supplementary_table_4.pdf]

**Table S4. Ki67 values of the xenograft tumor tissues.**

Paraffin-embedded tissue sections of xenograft tumors (6 per group) were analysed by immunohistochemistry using anti-Ki67 antibody. Average Ki67 score was calculated from 15 random fields.

| <b>Cell line</b>    | <b>Mouse ID</b> | <b>Ki67 score</b> | <b>Std Dev</b> |
|---------------------|-----------------|-------------------|----------------|
| <b>Empty vector</b> | 1               | 71.61             | 6.57           |
|                     | 2               | 71.59             | 12.80          |
|                     | 3               | 50.67             | 9.54           |
|                     | 4               | 49.00             | 10.04          |
|                     | 5               | 51.39             | 11.37          |
|                     | 6               | 56.19             | 11.55          |
| <b>His-KAL</b>      | 1               | 63.67             | 9.72           |
|                     | 2               | 78.01             | 8.16           |
|                     | 3               | 52.17             | 10.52          |
|                     | 4               | 50.71             | 13.94          |
|                     | 5               | 49.69             | 14.61          |
|                     | 6               | 45.72             | 13.01          |
